# Supplementary material for: The potential of platelet to high-density lipoprotein cholesterol ratio (PHR) as a novel biomarker for heart failure
Source: PubMed Central journal article supplement — Sci Rep. 2024 Oct 7;14:23283. doi: 10.1038/s41598-024-75453-7 (PMC11458566; doi:10.1038/s41598-024-75453-7), 2024-10-07
Supplement: 41598_2024_75453_MOESM1_ESM.pdf [file 41598_2024_75453_MOESM1_ESM.pdf]

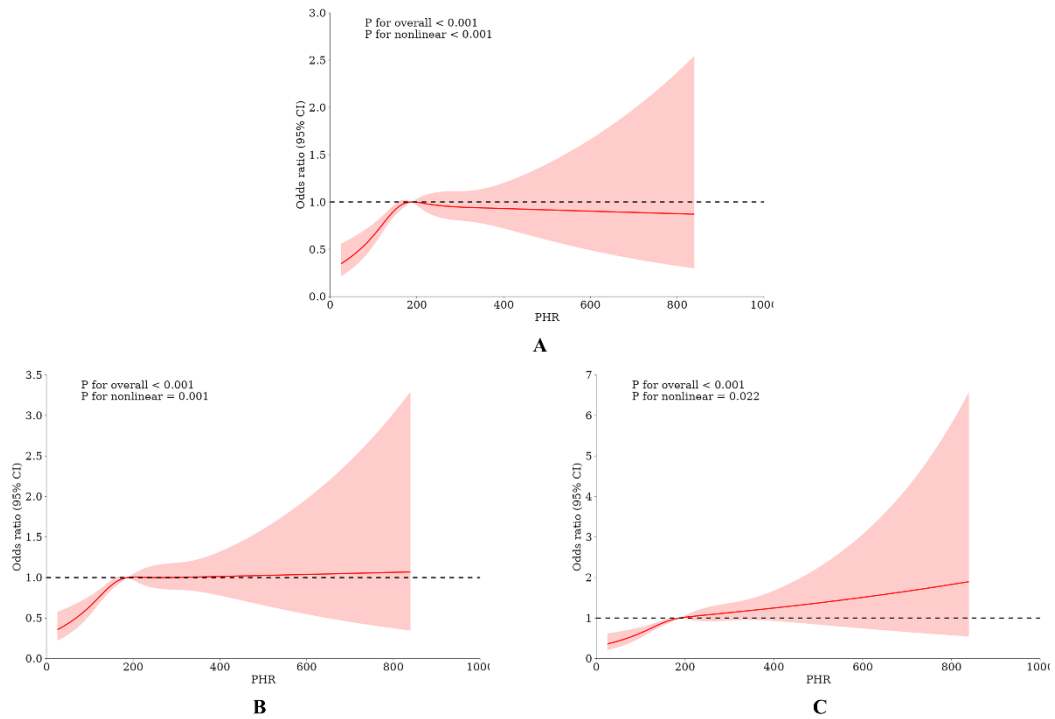

Figure S1. RCS curve plotting of the relationship between PHR and HF after multiple imputation.

(A) RCS curve plotting results with no covariates adjusted; (B) RCS curve plotting results adjusted for sex, age, race, education level, marital status, and PIR; (C) RCS curve plotting results adjusted for sex, age, race, education level, marital status, PIR, BMI, hypertension, smoking, alcohol consumption, coronary heart disease, angina, heart attack, and diabetes.
