# Supplementary figures and images for: The potential of platelet to high-density lipoprotein cholesterol ratio (PHR) as a novel biomarker for heart failure
Source: PubMed Central journal article supplement — Sci Rep. 2024 Oct 7;14:23283. doi: 10.1038/s41598-024-75453-7 (PMC11458566; doi:10.1038/s41598-024-75453-7), 2024-10-07

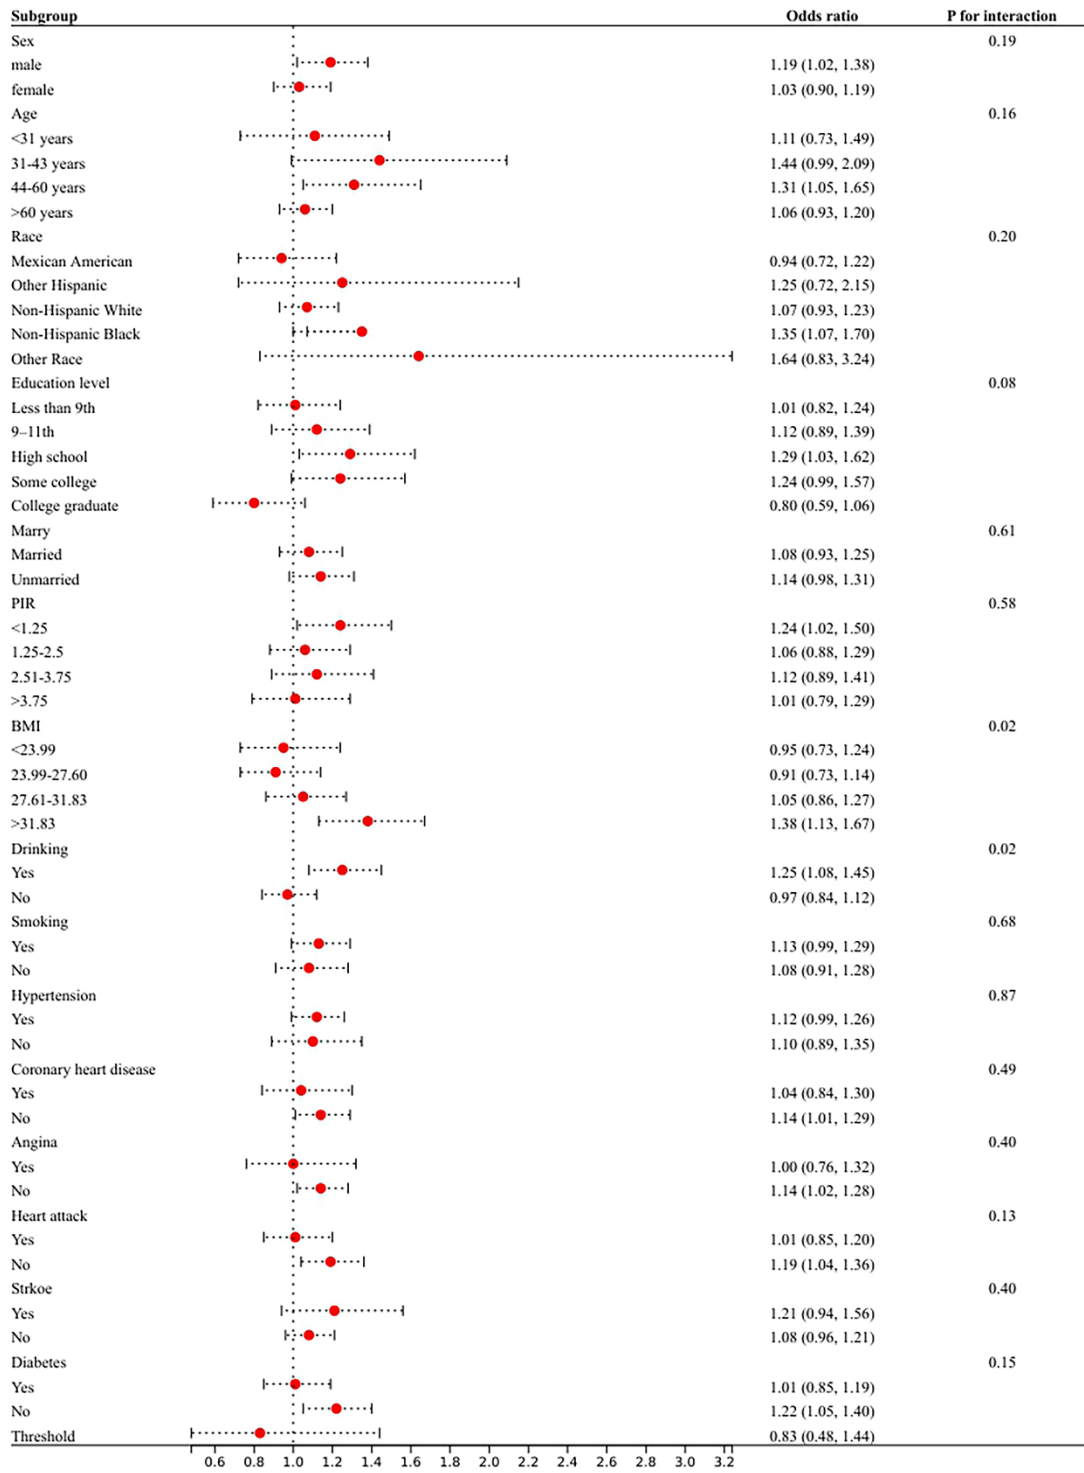

Figure S2. Subgroup analysis of the relationship between PHR and HF after multiple imputation.

Supplement: 41598_2024_75453_MOESM2_ESM.pdf [file 41598_2024_75453_MOESM2_ESM.pdf]
